# Supplementary material
Source: Springer Nature journal article supplement (https://www.springermedizin.de/resource/supplementary/12911_2012_510_MOESM5_ESM.pdf/9526050)

## Does the CDMS improve recording of key parameters?

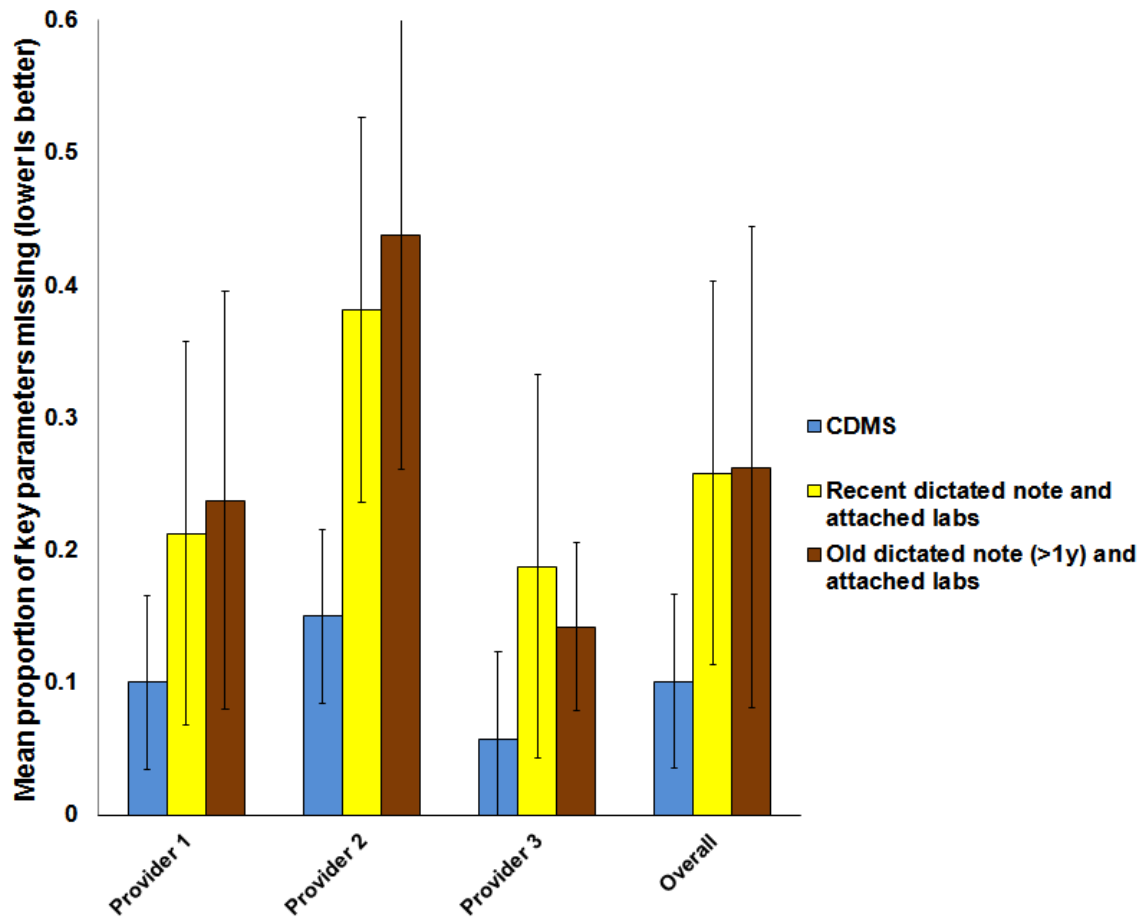

Supplement: MOESM5 [file 9526050]
